# Supplementary material
Source: PubMed Central journal article supplement (PMC4103160)
Supplement: NIHMS600532-supplement-Supp_FigureS1-2_TableS1.pdf [file NIHMS600532-supplement-Supp_FigureS1-2_TableS1.pdf]

## 1 SUPPLEMENTARY INFORMATION

### 2 Supplemental Methods:

#### 3 *Whole cell lysate extraction:*

4 H99 and *rpb4Δ::RPB4myc* were grown to mid-log phase in YPD, 30°C, 250 rpm. Cultures were  
5 harvested, washed with sterile deionized water, and whole cell lysates were obtained by  
6 mechanical disruption. Briefly, pellets were resuspended in 10% volume of lysis buffer (15 mM  
7 Hepes pH 7.4, 10 mM KCl, 5 mM MgCl<sub>2</sub>, 10 μl ml<sup>-1</sup> HALT protease inhibitor (Thermo Scientific),  
8 1 mM DTT) in microfuge tubes and glass beads were added. Tubes were vortexed for 30  
9 seconds alternating with incubation on ice for a total of 10 minutes. 200 μL ice cold lysis buffer  
10 was added and supernatants were transferred to new microfuge tubes. Lysates were cleared by  
11 2 rounds of centrifugation at 14,000 x g, 4°C, 5 minutes.

#### 12 *Western blot Analysis:*

13 50 μg of protein from whole cell lysates (above) were boiled in Laemmli buffer and  
14 electrophoresed on 4-12% Tris-glycine polyacrylamide gels. Gels were transferred to  
15 nitrocellulose (iBlot, Invitrogen). Membranes were incubated in PBS for 5 minutes followed by  
16 incubation with Odyssey Blocking Buffer (LiCOR) for one hour at room temperature or overnight  
17 at 4°C. Membranes were probed with mouse anti-myc antibody (1:1000 in 5 ml PBS + 0.1%  
18 Tween + 5 ml Odyssey Blocking Buffer) overnight at 4°C. Membranes were washed 4 times, 5  
19 minutes each with shaking in PBS+0.1% Tween. Membranes were probed with IR680-  
20 conjugated Donkey anti-mouse antibody (1:10,000 in PBS) for one hour at room temperature.  
21 Membranes were washed as above and imaged using the LiCOR Odyssey Imaging system.

22

23 *Coimmunoprecipitation:*

24 Coimmunoprecipitation was performed using the ProFound c-myc IP/CoIP Application Set  
25 (Thermo Scientific) according to manufacturer's protocol with some modifications. Briefly, 600  
26 µg of protein and 10 µl of anti-myc agarose was added to columns and incubated overnight at  
27 4°C with rotation. Flow through was collected. Three washes with PBS with increasing amounts  
28 of Tween (0.1%, 0.15%, 0.2%) were collected followed by elution with non-reducing sample  
29 buffer provided in the kit. Flow through, washes, and eluates were denatured and  
30 electrophoresed on a 4-12% Bis-Tris polyacrylamide gel followed by staining with SimpleBlue  
31 (Invitrogen).

32 *Liquid Chromatography Tandem Mass Spectrometry:*

33 LC/MS/MS analyses were performed by the Proteomics core at Fred Hutchinson Cancer  
34 Research Center. Gel bands were digested with trypsin, desalted and analyzed with an orbitrap  
35 mass spectrometer. The DB search was done using *Cryptococcus neoformans* H99 protein  
36 database (Broad Institute of Harvard and MIT (<http://www.broadinstitute.org>)) after adding  
37 common contaminants (i.e. human keratin). The cut-off for peptide ID was error rate  $\leq 0.05$ , and  
38 for protein ID, probability score  $\geq 0.9$ .

39

40 **Supplemental Results:**

41 The Rpb4-myc-tagged strain was created to verify the functional conservation of Rpb4 in *C.*  
42 *neoformans*. To verify that myc-tagged Rpb4 protein was being produced in this strain, we  
43 performed a western blot analysis with an anti-myc primary antibody to detect the myc-tag  
44 epitope (Fig. S1 A). We observed a band at ~20kDa, the estimated molecular weight of Rpb4,

45 in the *rpb4Δ::RPB4myc* strain. We also observed a band for GSTmyc in our *E. coli* control  
46 lysate, verifying the ability of our antibody to recognize the myc-tag epitope. As expected, we  
47 did not observe any bands from our wild type whole cell lysate.

48 To confirm that Rpb4 in *C. neoformans* is a functional homolog of the *S. cerevisiae* RNA  
49 polymerase II subunit Rpb4p, we performed Co-Immunoprecipitations with whole cell lysates  
50 from the wild type and the *rpb4Δ::RPB4myc* strains using anti-myc agarose (Fig. S1 B). We  
51 observed 3 specific bands in the eluate from the RPB4myc strain that were not present in the  
52 eluate from wild type. These bands were excised and analyzed by LC/MS/MS. Our analysis  
53 revealed that the two heavier bands corresponded to Rpb1 (CNAG\_02166, 196kDa) and Rpb2  
54 (CNAG\_01235, 140kDa), the two largest subunits in the RNA polymerase II holoenzyme. These  
55 interactions verified the conserved function of Rpb4 in this complex. We also identified Hsp104  
56 (CNAG\_07347, 100kDa) as the third band. However, at this point we can not speculate about  
57 this association.

58 We utilized the *rpb4Δ::RPB4myc* strain to determine the localization of Rpb4 during optimal  
59 conditions and following a shift to host-temperature. We observed that Rpb4myc shifted from  
60 the nucleus during optimal conditions, to the cytoplasm after the temperature shift. We  
61 speculated that this cytoplasmic accumulation was related to the role in enhanced degradation.  
62 However, it is possible that the myc-tag interfered with the function of Rpb4. To confirm that the  
63 myc-tag did not alter the function of Rpb4 in degradation, we analyzed the stability of *RPL2* in  
64 the *rpb4Δ::RPB4myc* strain following a shift to 37°C (Fig. S1 C). The half-life of *RPL2* in the  
65 *rpb4Δ::RPB4myc* strain was consistent with our results obtained with the wild type (<20  
66 minutes), whereas the half-life of *RPL2* in the parental *rpb4Δ* strain was stabilized. These  
67 results verified that the RPB4myc construct restored Rpb4 function to the *rpb4Δ* strain.

68 We determined that signaling through Pkh202 triggered enhanced degradation of RP transcripts  
69 immediately following a shift to host-temperature. We were interested in identifying downstream  
70 targets of Pkh2 that may also affect this response. It was previously shown that Pkh1-  
71 dependent activation of Pkc1 influences P-body formation and mRNA degradation during  
72 nutrient stress in *S. cerevisiae* (Luo et al., 2011). To begin investigating the downstream  
73 components of the signaling cascade that mediates stress-responsive changes in mRNA  
74 degradation, we measured RP transcript decay in the *bck1Δ* mutant, which is null for the  
75 MAPKKK in the PKC-MPK1 signaling pathway. RP transcript decay in the *bck1Δ* mutant was  
76 identical to wild type (Fig. S2), suggesting that Pkh2-02 influences host-temperature induced RP  
77 transcript degradation independent of the PKC-dependent MAP kinase cascade.

78

## 79 **Supplementary Figure Legends**

80 **Figure S1. Complementation by Rpb4-myc.** A. Western blot analysis verifying the protein  
81 production of myc-tagged Rpb4. GSTmyc is a positive control from *E. coli* extract containing c-  
82 Myc-tagged GST B. Eluted fractions from coimmunoprecipitation reactions with anti-c-myc  
83 agarose. Arrows point to bands that were present in the *rpb4Δ::RPB4myc* eluate and absent in  
84 the wild type. Rpb1 and Rpb2 are subunits of RNA polymerase II; Hsp104 is a heat shock  
85 protein. C. Stability of *RPL2* following a shift to host temperature. Stability of *RPL2* in the  
86 *rpb4Δ::RPB4myc* strain is comparable to the wild type indicating that Rpb4myc rescues the  
87 defect in destabilization in the *rpb4Δ* mutant strain.

88 **Figure S2. Signaling through Pkh2-02, independent of the PKC-dependent MAP Kinase**  
89 **Cascade, mediates destabilization of RP transcripts during host-temperature adaptation.**  
90 Wild type and *bck1Δ* cultures were transcriptionally arrested and simultaneously shifted to 37°C

91 for one hour. Stability of *RPL2* was analyzed by northern blot. Expression of all transcripts was  
92 normalized to ribosomal RNA and plotted on log2 graphs. All data presented is representative of  
93 3 biological replicates.

94

95

96

97

98

99

100

101

102

103

104

105

106

107

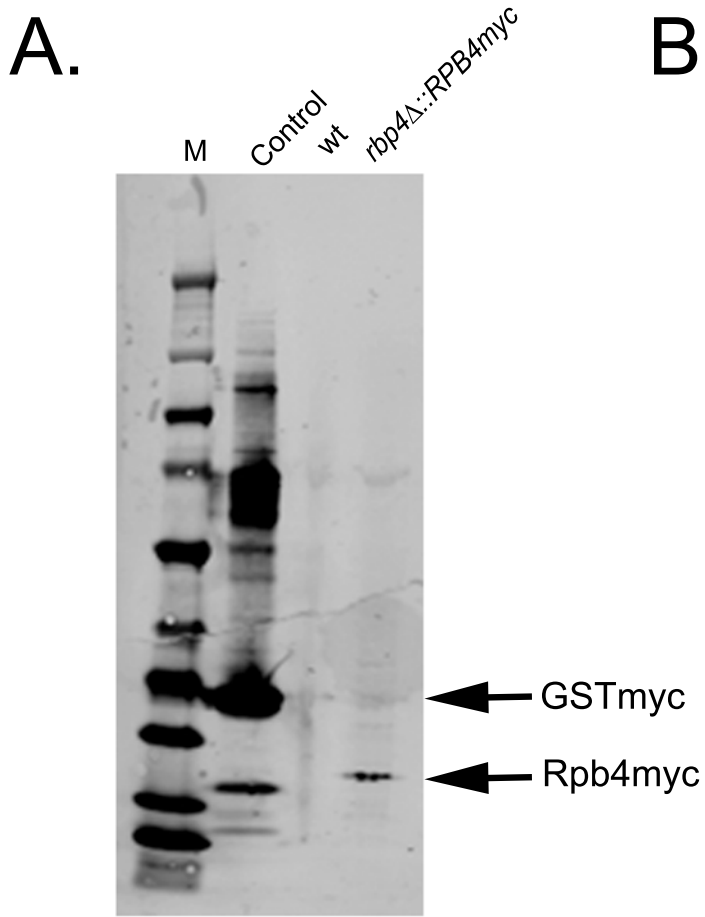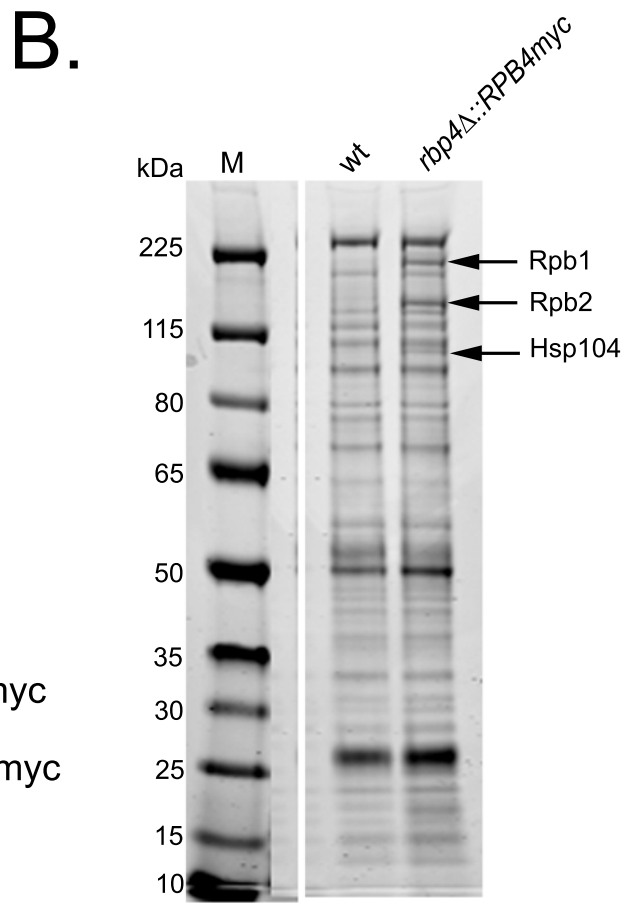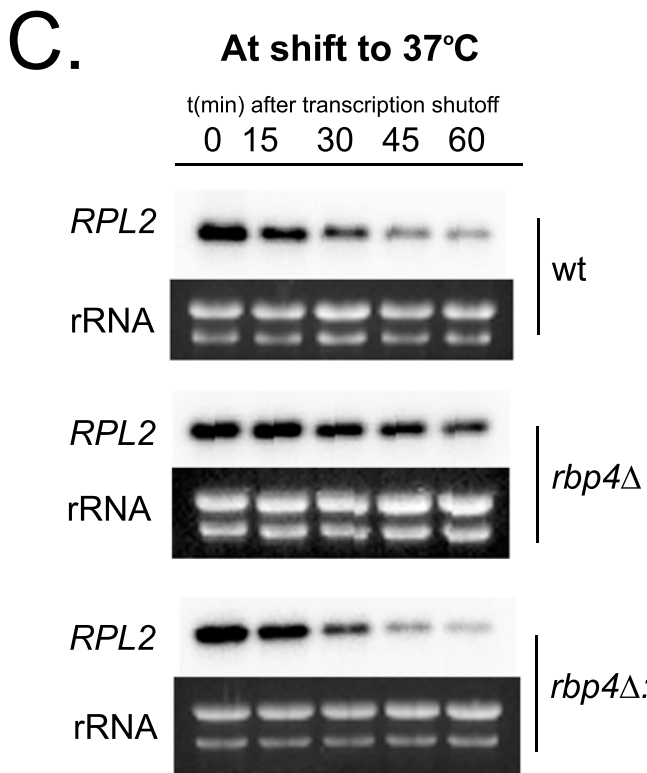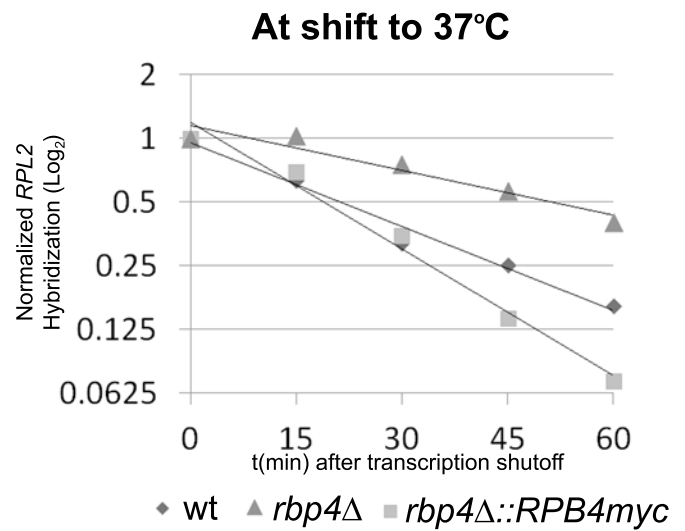

Figure S1

**B.****At shift to 37°C**

t(min) after transcription shutoff

0 15 30 45 60

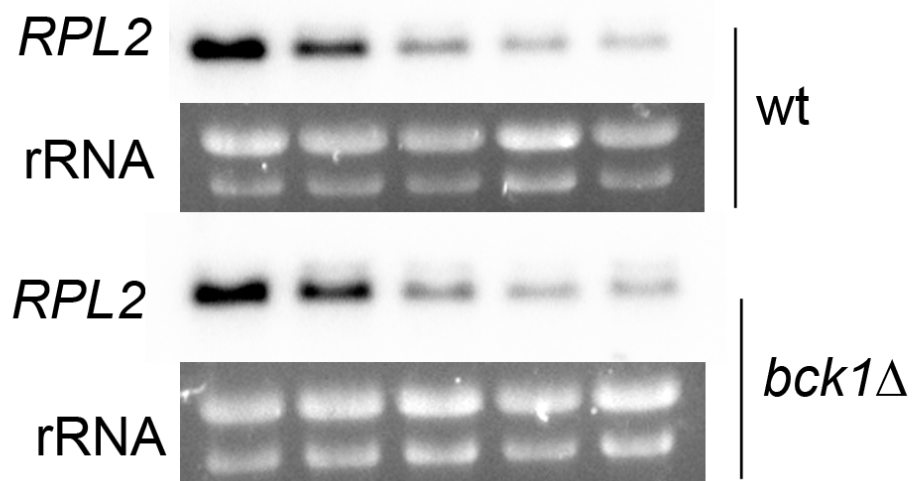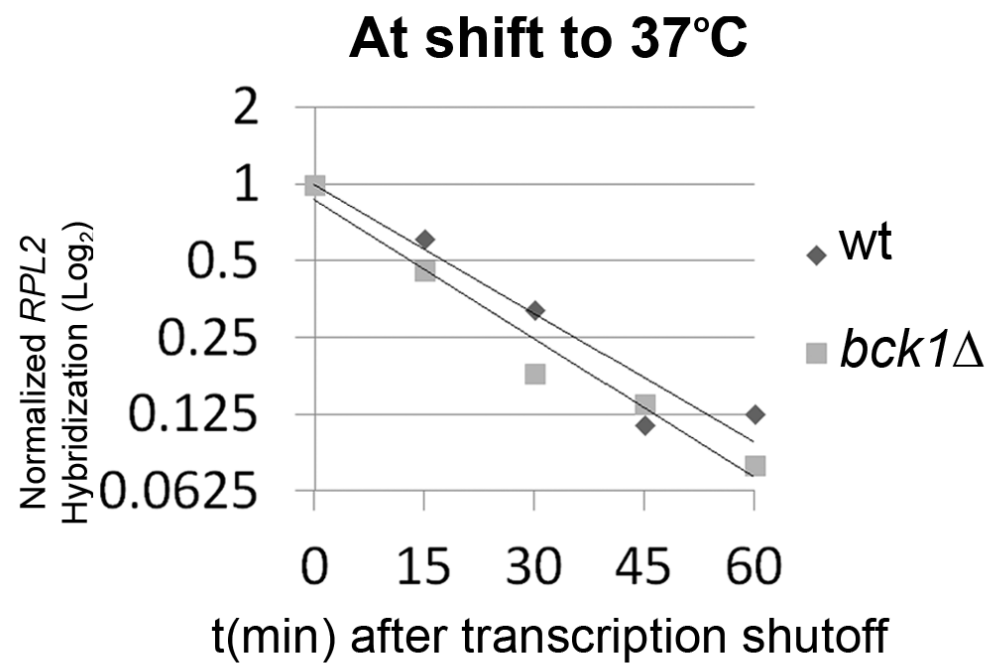

Figure S2

108 **Supplementary Table 1. Primers used in this study.**

| <b>Primer name</b>    | <b>Sequence</b>                                               |
|-----------------------|---------------------------------------------------------------|
| 5'RPB4up-XbaI         | TAATAATCTAGAGGCTTGTACTCTGGCTCCTGC                             |
| 3' RPB4up-BglII       | TAATAAAGATCTTTGTAATATGCGGATGGATGTCG                           |
| 5'RPB4down-MunI       | TAATAACAATTGAGAGGAGGGACTTTCCTGG                               |
| 3'RPB4down-XhoI       | TAATAACTCGAGGGAGAATCTGCTAGAAGTTGG                             |
| 5'NAT-BglII           | TAATAAAGATCTGCTGCGAGGATGTGAGCTGG                              |
| 3'NAT-MunI            | TAATAACAATTGAAGCTTATAGAAGAGATGTAGAACTAGC                      |
| 5'RPB4-KO-PCR         | ACGCGATGTTGACGGTCC                                            |
| 3'RPB4-KO-PCR         | GAACGATTTGCCTTCTCTGG                                          |
| 5'RPB4-KO-screen      | CGACTGTGAAGCCAACGC                                            |
| 3'RPB4-KO-screen      | TTGAGATTCAAAATTATGAAGG                                        |
| 5'RPB4complement-MunI | TAATAACAATTGCATACACCTAGACAAGCAGGG                             |
| 3'RPB4complement-MunI | TAATAACAATTGAGACTGTAGATGTGCCGATCG                             |
| Rpb4-myc              | CGGTGTTCCAGCCCGAGCAGAAGCTTATCTCTGAGGAGGACCTTTAGATTCTAGTCAAAGG |
| Rpb4-myc-RC           | CCTTTGACTAGAATCTAAAGGTCCTCCTCAGAGATAAGCTTCTGCTCGGGCTGAACACCG  |
| RPL8 RNaseH cleavage  | GATGAGACCGGCTTTTTGACC                                         |

109
